# Supplementary material
Source: PubMed Central journal article supplement (PMC3055703)
Supplement: 97320630005255S1.pdf [file 97320630005255S1.pdf]

## Supplementary material:

**Table 1:** Compound identification in *E. coli* metabolome analysis

| Structural formula                                        | PubChemID | Predicted retention time | Database                        |
|-----------------------------------------------------------|-----------|--------------------------|---------------------------------|
| <chem>CC(O)(C(=O)O)CCO)n1cnc2c(N)ncnc12</chem>            | 5745135   | 1.109                    | PubChem                         |
| <chem>CC(=O)Nc1nc(=O)n2cnc(CC(O)CO)c2[nH]1</chem>         | 5273998   | 1.087                    | PubChem                         |
| <chem>CC1NC(C(O)C1O)c2[nH]nc3c(=O)[nH]c(=O)[nH]c23</chem> | 9881807   | 1.187                    | PubChem                         |
| <chem>Nc1ncnc2n(cnc12)C3OC(CO)C(O)C3O</chem>              | 191       | 1.229                    | PubChem, ChEBI, MetaCyc, EcoCyc |
| <chem>CC1OC(C(O)C1O)n2cnc3c(=O)nc(N)[nH]c23</chem>        | 101255    | 1.241                    | PubChem                         |
| <chem>CC(=O)OCCCO)n1cnc2c(=O)nc(N)[nH]c12</chem>          | 6320052   | 0.807                    | PubChem                         |
| <chem>CC(=O)OCCCO)n1cnc2[nH]c(N)nc(=O)c12</chem>          | 11346170  | 0.807                    | PubChem                         |
| <chem>CC(=O)OCCCO)n1cnc2c(=O)nc(N)[nH]c12</chem>          | 3011667   | 0.807                    | PubChem                         |
| <chem>CC(=O)Nc1nc(=O)c2n(COCCO)cnc2[nH]1</chem>           | 11471131  | 0.79                     | PubChem                         |
| <chem>CC(=O)Nc1nc(=O)c2ncn(COCCO)c2[nH]1</chem>           | 3109164   | 0.79                     | PubChem                         |
| <chem>CC(=NNC(=O)C(=O)N)CCn1[nH]c(=O)ccc1=O</chem>        | 365874    | 0.758                    | PubChem                         |
| <chem>CC(O)C(O)C(O)c1cnc2[nH]c(N)nc(=O)c2n1</chem>        | 5007917   | 0.747                    | PubChem                         |
| <chem>CC(=C1C(=O)NC(=O)N(CC=C)C1=O)NNC(=O)N</chem>        | 6807374   | 0.689                    | PubChem                         |
| <chem>NC1=C2N=CN(C3OC(CO)C(O)C3=O)C2N=CN1</chem>          | 443235    | 0.673                    | ChEBI, MetaCyc                  |
| <chem>NC(COC1OC(CO)C(O)C(O)C1O)C(=O)O</chem>              | 132873    | 0.662                    | ChEBI                           |
| <chem>NC(C(O)CC(=O)C(=O)O)C(O)C(O)C(O)CO</chem>           | 349961    | 0.654                    | ChEBI                           |
| <chem>NC(C(O)CC(=O)C(=O)O)C(O)C(O)C(O)CO</chem>           | 5460034   | 0.654                    | ChEBI                           |
| <chem>CC1NC(C(O)C1O)C2NN=C3C2=NC(=O)NC3=O</chem>          | 9881806   | 0.654                    | PubChem                         |
| <chem>CC1OC(C(O)C1O)n2cnc3c(=O)nc(N)nc23</chem>           | 11300122  | 0.654                    | PubChem                         |

This table shows the results for candidate compounds obtained by mass-based database search. These compounds are sorted by the difference between the measured retention time (1.1338) and the predicted retention time. The fourth compound colored gray is the only one registered in the *E. coli* compound database EcoCyc and was successfully identified as the target compound.
